# Supplementary material for: Severity of respiratory failure at admission and in-hospital mortality in patients with COVID-19: a prospective observational multicentre study
Source: HighWire-hosted journal article supplement (doi:10.1136/bmjopen-2020-043651), 2020-10-01
Supplement: bmjopen-2020-043651supp001_data_supplement.pdf [file bmjopen-2020-043651supp001_data_supplement.pdf]

## SUPPLEMENTAL MATERIAL

**TITLE:** SEVERITY OF RESPIRATORY FAILURE AT ADMISSION AND IN-HOSPITAL MORTALITY IN PATIENTS WITH COVID-19: A PROSPECTIVE OBSERVATIONAL MULTICENTRE STUDY.

### Participating centers

1. Division of Respiratory Diseases, Ospedale L. Sacco, ASST Fatebenefratelli-Sacco, Via G.B. Grassi 74 – 20157, Milano, Italy.
2. Department of Medicine and Rehabilitation, Division of Emergency Medicine, Ospedale Fatebenefratelli - ASST Fatebenefratelli-Sacco, Piazzale Principessa Clotilde, 3 - 20121 Milano, Italy.
3. Division of Internal Medicine, Ospedale L. Sacco - ASST Fatebenefratelli-Sacco, Via G.B. Grassi 74 – 20157, Milano, Italy.
4. Department of Health Bioscience, Università degli Studi di Milano—Respiratory Unit, Policlinico di San Donato, IRCCS— Via Rodolfo Morandi, 30 - 20097, San Donato Milanese, Milano, Italy.

**The study protocol is available at:** [ClinicalTrials.gov: NCT04307459](https://clinicaltrials.gov/ct2/show/study/NCT04307459)

### Definition of immunocompromission

Immunocompromission was defined as the presence of  $\geq 1$  of the following risk factors:[1]

1. Acquired Immuno-Deficiency Syndrome (AIDS), defined either as human immunodeficiency virus infection with CD4+ lymphocyte count  $< 200/\mu\text{L}$  or by the occurrence of AIDS-defining conditions;
2. aplastic anemia;
3. asplenia;
4. hematological cancer, defined as lymphoma, acute or chronic leukemia, or multiple myeloma;
5. chemotherapy during the last 3 months;

6. neutropenia, defined as a neutrophil count <500/dL at complete blood cell count;
7. biological drug use (including trastuzumab and therapies for autoimmune diseases, e.g., anti-tumor necrosis factor  $\alpha$ , prescribed during  $\geq 6$  months before hospital admission);
8. lung transplantation;
9. chronic steroid use (>10 mg/d of prednisone or equivalent  $\geq 3$  months before hospital admission);
10. lung cancer with either neutropenia or chemotherapy;
11. other solid tumor with either neutropenia or chemotherapy;
12. other immunocompromise (any immunocompromised state, including congenital/genetic immunocompromised and immunosuppressive therapy due to hematological cancer/solid organ transplantation other than lung).

### Criteria for hospitalization

Hospitalization criteria were based on the standard operating procedures created for the management of patients with suspected Covid-19,[2, 3] and on the latest international recommendations.[4, 5] Criteria included any of the following: 1) the presence of respiratory failure at admission (a PaO<sub>2</sub> <60 mmHg while breathing room air or a PaO<sub>2</sub>/FiO<sub>2</sub> ratio <300 mmHg); 2) age >65 years old with one or more comorbidities, pulmonary infiltrates at the chest X-ray or Ct scan and respiratory distress (a respiratory rate  $\geq 30$  breaths/minute and dyspnea); 3) pulmonary infiltrates and persistence of respiratory symptoms (cough, chest tightness, dyspnea at rest or during effort, fever) for more than 10 days; 4) pulmonary infiltrates with evidence of oxygen desaturation (drop in SpO<sub>2</sub> of more than 4 units from resting value) while walking for 3 minutes; 5) hemodynamic instability, sepsis or shock; 6) sepsis and septic shock; 7) pulmonary infiltrates associated with confusion or a Glasgow Coma Scale <15; 8) inability to cope with outpatient therapy due to psychosocial or such as inability to maintain oral intake, history of substance abuse, cognitive impairment, severe comorbid illnesses, and impaired functional status.[5]

### References

1. Di Pasquale MF, Sotgiu G, Gramegna A, et al; GLIMP Investigators. Prevalence and Etiology of Community-acquired Pneumonia in Immunocompromised Patients. *Clin Infect Dis* 2019;68:1482-93. doi: 10.1093/cid/ciy723.
2. Vitacca M, Nava S, Santus P, Harari S. Early consensus management for non-ICU ARF SARS-CoV-2 emergency in Italy: from ward to trenches. *Eur Respir J* 2020;2000632. doi: 10.1183/13993003.00632-2020.
3. Radovanovic D, Rizzi M, Pini S, et al. Helmet CPAP to Treat Acute Hypoxemic Respiratory Failure in Patients with COVID-19: A Management Strategy Proposal. *J Clin Med* 2020;9:E1191. doi: 10.3390/jcm9041191
4. World Health Organization. Clinical management of severe acute respiratory infection (SARI) when COVID-19 disease is suspected. Interim guidance. 13 March 2020. Available at: <https://www.who.int/docs/default-source/coronaviruse/clinical-management-of-novel-cov.pdf>. Accessed 17 May 2020.
5. Metlay JP, Waterer GW, Long AC, et al. Diagnosis and Treatment of Adults with Community-acquired Pneumonia. An Official Clinical Practice Guideline of the American Thoracic Society and Infectious Diseases Society of America. *Am J Respir Crit Care Med* 2019;200:e45–67. doi: 10.1164/rccm.201908-1581ST.

**Supplemental Table 1. Complete list of comorbidities observed in the study sample.**

| <b>COMORBIDITIES</b>                     |            |
|------------------------------------------|------------|
| Hypertension, n (%)                      | 160 (38.8) |
| Ischaemic heart disease, n (%)           | 43 (10.4)  |
| Arrhythmia, n (%)                        | 49 (11.9)  |
| Vasculopathy, n (%)                      | 32 (7.8)   |
| Valvulopathy, n (%)                      | 15 (3.6)   |
| Heart failure, n (%)                     | 17 (4.1)   |
| Cardiovascular disease*, n (%)           | 207 (50.2) |
| Diabetes mellitus, n (%)                 | 69 (16.8)  |
| Severe obesity, n (%)                    | 26 (6.3)   |
| COPD, n (%)                              | 25 (6.1)   |
| Obstructive sleep apnoea syndrome, n (%) | 5 (1.2)    |
| Asthma, n (%)                            | 13 (3.2)   |
| Interstitial lung disease, n (%)         | 1 (0.2)    |
| Active solid cancer, n (%)               | 20 (4.9)   |
| Active haematological tumour, n (%)      | 7 (1.7)    |
| Previous cancer, n (%)                   | 18 (4.4)   |
| Anaemia, n (%)                           | 8 (1.9)    |
| Immune depression, n (%)                 | 39 (9.5)   |
| Psychiatric disease, n (%)               | 12 (2.9)   |
| Endocrinology disease, n (%)             | 57 (13.9)  |
| Neurological disease, n (%)              | 49 (11.9)  |
| Kidney disease, n (%)                    | 31 (7.5)   |
| Gastrointestinal disease, n (%)          | 28 (6.8)   |
| MRGE, n (%)                              | 12 (2.9)   |
| Rheumatology, n (%)                      | 4 (1.0)    |
| Orthopaedic disease, n (%)               | 31 (7.5)   |
| BPH, n (%)                               | 25 (6.1)   |
| Infectious, n (%)                        | 7 (1.7)    |
| Eye disease, n (%)                       | 9 (2.2)    |
| ORL, n (%)                               | 4 (1.0)    |
| Haematological disease, n (%)            | 8 (1.9)    |
| Gynaecological disease, n (%)            | 9 (2.2)    |
| Depression, n (%)                        | 9 (2.2)    |
| Others psychiatric disease, n (%)        | 5 (1.2)    |
| Hypothyroidism, n (%)                    | 32 (7.8)   |
| Hyperuricemia, n (%)                     | 4 (1.0)    |
| Osteoporosis, n (%)                      | 7 (1.7)    |
| Others endocrinological disease, n (%)   | 8 (1.9)    |
| Stroke, n (%)                            | 17 (4.1)   |
| Mental disability, n (%)                 | 5 (1.2)    |
| Alzheimer, n (%)                         | 5 (1.2)    |
| Dementia, n (%)                          | 7 (1.7)    |

|                                    |          |
|------------------------------------|----------|
| Epilepsy, n (%)                    | 8 (1.9)  |
| Others neurological disease, n (%) | 14 (3.4) |
| CKD, n (%)                         | 25 (6.1) |
| Kidney stones, n (%)               | 7 (1.7)  |
| Others renal disease, n (%)        | 7 (1.7)  |
| Cholecystectomy, n (%)             | 9 (2.2)  |
| Appendectomy, n (%)                | 9 (2.2)  |
| Gastric/Duodenal ulcer, n (%)      | 6 (1.5)  |
| Chronic Hepatitis-C, n (%)         | 6 (1.5)  |
| Others gastro, n (%)               | 18 (4.4) |
| Prosthetics, n (%)                 | 12 (2.9) |
| Hernia, n (%)                      | 14 (3.4) |
| Others surgery, n (%)              | 8 (1.9)  |
| Hysterectomy, n (%)                | 7 (1.7)  |
| Others gynaecology, n (%)          | 0 (0.0)  |

BPH: benign prostate hypertrophy; COPD: chronic obstructive pulmonary disease; CKD: chronic kidney disease; CPAP: continuous positive airway pressure; LMWH: low molecular weight heparin; ORL: otolaryngology.

**Supplemental Table 2. Respiratory failure and outcomes in patients exposed and not exposed to angiotensin converting enzyme inhibitors**

|                                                                          | <b>Not-exposure to ACE inhibitors (n= 353)</b> | <b>Exposure to ACE inhibitors (n= 59)</b> | <b>p-value</b> |
|--------------------------------------------------------------------------|------------------------------------------------|-------------------------------------------|----------------|
| Median (IQR) PaO <sub>2</sub> /FiO <sub>2</sub> ratio at admission, mmHg | 273 (148.0-346.5)                              | 223.5 (113-290)                           | 0.004          |
| Presence of respiratory failure at admission, n (%)                      | 250 (70.8)                                     | 49 (83.1)                                 | 0.05           |
| Need for CPAP at admission, n (%)                                        | 34 (9.6)                                       | 6 (10.2)                                  | 0.90           |
| Need for CPAP during the hospital stay, n (%)                            | 148 (41.9)                                     | 28 (47.5)                                 | 0.43           |
| In-hospital mortality, n (%)                                             | 83 (23.5)                                      | 21 (35.6)                                 | 0.048          |
| Need for intubation, n (%)                                               | 31 (8.8)                                       | 5 (8.5)                                   | 0.94           |

ACEi: angiotensin converting enzyme inhibitors; PaO<sub>2</sub>: arterial partial pressure of oxygen; FiO<sub>2</sub>: fraction of inhaled oxygen; CPAP: continuous positive airway pressure.

**Supplemental table 3. Respiratory failure severity and outcomes in patients exposed and not exposed to angiotensin receptor blockers**

|                                                                          | <b>Non-exposure to ARBs<br/>(n = 351)</b> | <b>Exposure to ARBs<br/>(n= 61)</b> | <b>p-value</b> |
|--------------------------------------------------------------------------|-------------------------------------------|-------------------------------------|----------------|
| Median (IQR) PaO <sub>2</sub> /FiO <sub>2</sub> ratio at admission, mmHg | 262 (140-341)                             | 289 (140-343)                       | 0.98           |
| Presence of respiratory failure at admission, n (%)                      | 252 (71.8)                                | 47 (77.1)                           | 0.40           |
| Need for CPAP at admission, n (%)                                        | 32 (9.1)                                  | 8 (13.1)                            | 0.33           |
| Need for CPAP during the hospital stay, n (%)                            | 146 (41.6)                                | 30 (49.2)                           | 0.27           |
| In-hospital mortality, n (%)                                             | 90 (25.6)                                 | 14 (23.0)                           | 0.66           |
| Need for intubation, n (%)                                               | 32 (9.1)                                  | 4 (6.6)                             | 0.63           |

ARBs: angiotensin receptor blockers; PaO<sub>2</sub>: arterial partial pressure of oxygen; FiO<sub>2</sub>: fraction of inhaled oxygen; CPAP: continuous positive airway pressure.

**Supplemental table 4. Severity of respiratory failure and outcomes in patients with hypertension compared with patients without hypertension.**

|                                                       | Hypertension<br>(n = 160) | No-<br>hypertension<br>(n= 252) | p-value | No-hypertension (n= 252)  |              |                     |              |
|-------------------------------------------------------|---------------------------|---------------------------------|---------|---------------------------|--------------|---------------------|--------------|
|                                                       |                           |                                 |         | Without<br>CVD<br>(n=205) | p-<br>value* | With CVD<br>(n= 47) | p-<br>value* |
| PaO <sub>2</sub> /FiO <sub>2</sub> at admission, mmHg | 214.5 (120.0-300.0)       | 291.5 (153.5-362.0)             | <0.0001 | 307.5 (180-381)           | <0.0001      | 184 (126-310)       | 0.65         |
| Respiratory failure at admission, n (%)               | 135 (84.4)                | 164 (65.1)                      | <0.0001 | 125 (61.0)                | <0.0001      | 39 (83.0)           | 0.82         |
| CPAP at admission, n (%)                              | 18 (11.3)                 | 22 (8.7)                        | 0.40    | 16 (7.8)                  | 0.26         | 6 (18.8)            | 0.78         |
| CPAP in-hospital, n (%)                               | 76 (47.5)                 | 100 (39.7)                      | 0.12    | 76 (37.1)                 | 0.045        | 24 (51.2)           | 0.67         |
| In-hospital mortality, n (%)                          | 53 (33.1)                 | 51 (20.2)                       | 0.003   | 32 (15.6)                 | <0.0001      | 19 (40.4)           | 0.36         |
| Intubation, n (%)                                     | 10 (6.3)                  | 26 (10.3)                       | 0.15    | 23 (11.2)                 | 0.10         | 3 (6.4)             | 0.97         |

A sensitivity analysis has been performed excluding patients with cardiovascular diseases from patients without hypertension. PaO<sub>2</sub>: arterial partial pressure of oxygen; FiO<sub>2</sub>: fraction of inhaled oxygen; CPAP: continuous positive airway pressure.

\* VS. patients with hypertension
